# Supplementary material for: Don’t help them to bury the light. The interplay between intersystem crossing and hydrogen transfer in photoexcited curcumin revealed by surface-hopping dynamics
Source: Royal Society of Chemistry journal article supplement (doi:10.1039/d1cp03617c), 2021-01-01
Supplement: d1cp03617c1.pdf [file d1cp03617c1.pdf]

## Electronic Supplementary Information for:

# Don't help them to bury the light. The interplay between intersystem crossing and hydrogen transfer in photoexcited curcumin revealed by state-hopping dynamics

Raul Losantos,<sup>a,b,\*</sup> Andreea Pasc,<sup>b</sup> and Antonio Monari<sup>a,c,\*</sup>

<sup>a</sup>Université de Lorraine and CNRS, UMR 7019 LPCT, F-54000 Nancy, France.

<sup>b</sup>Université de Lorraine and CNRS, UMR 7053 L2CM, F-54000 Nancy, France.

<sup>c</sup>Université de Paris and CNRS, Itodys, F-75006 Paris, France.

[\\*Antonio.monari@univ-lorraine.fr](mailto:Antonio.monari@univ-lorraine.fr), [raul.losantos-cabello@univ-lorraine.fr](mailto:raul.losantos-cabello@univ-lorraine.fr)

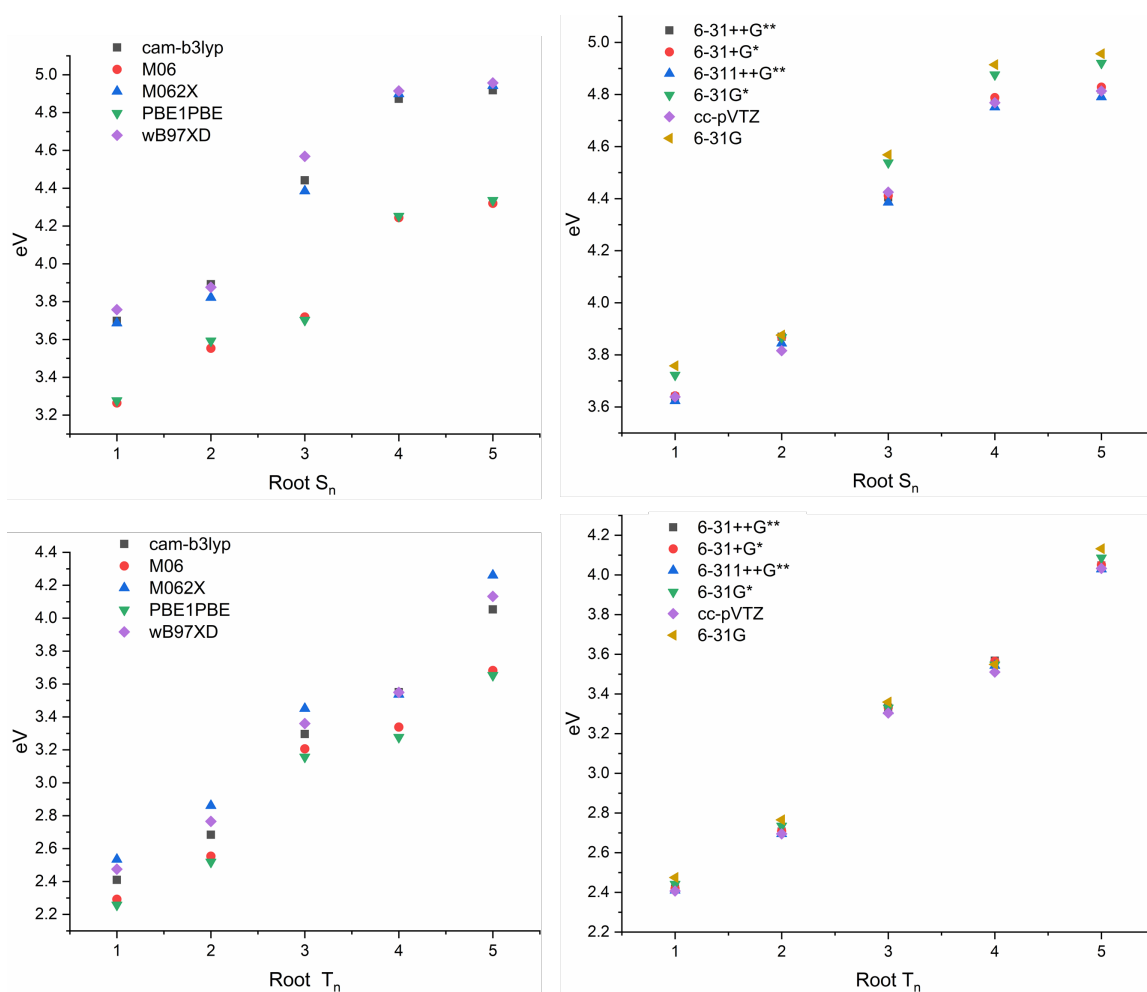

Figure S1. Energy levels of the excited singlet (top row) and triplet (bottom row) calculated with different functionals using the 6-31G and basis sets using the ωB97XD at the Franck-Condon geometry.

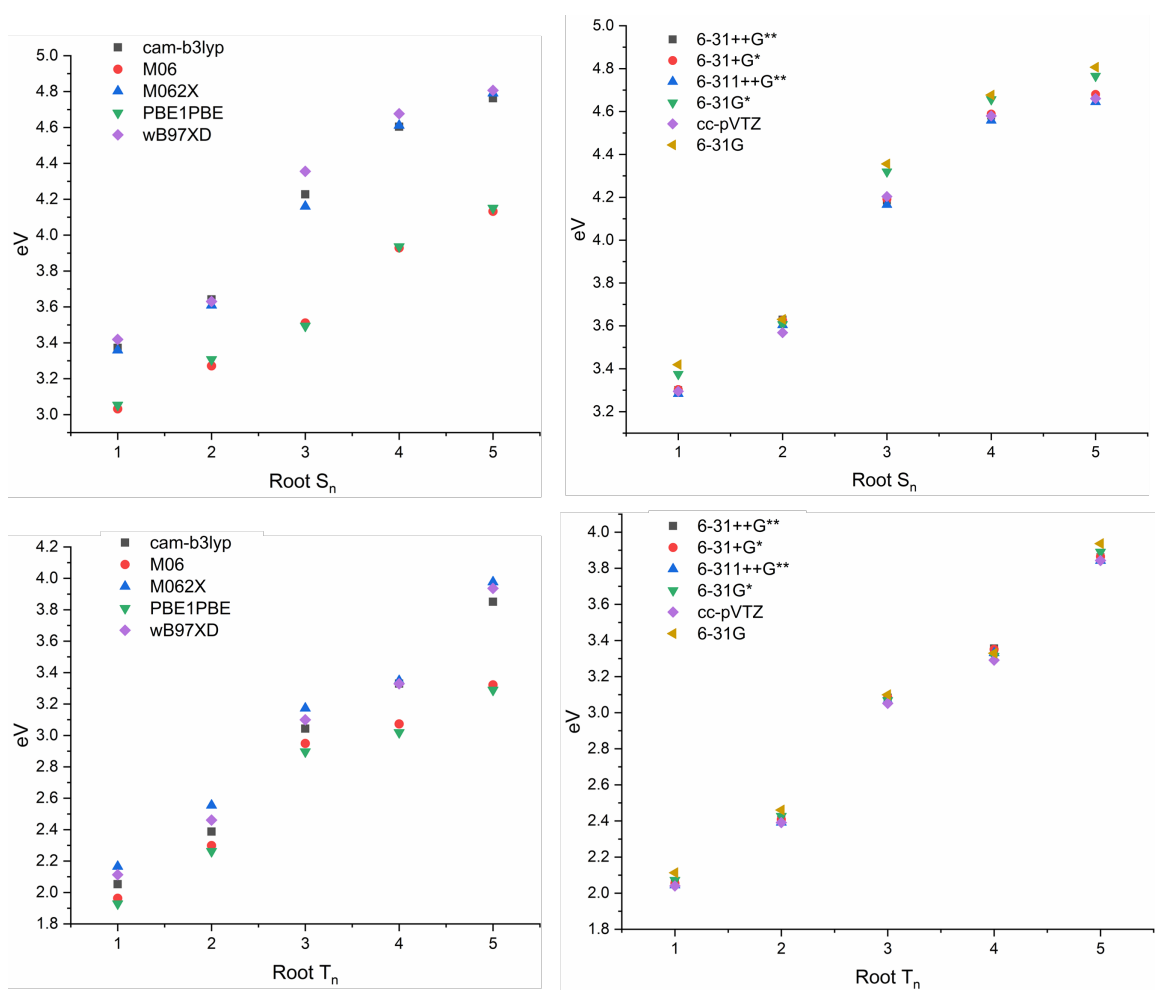

Figure S2. Energy levels of the excited singlet (top row) and triplet (bottom row) calculated with different functionals using the 6-31G and basis sets using the  $\omega$ B97XD at the  $S_1$  equilibrium geometry.

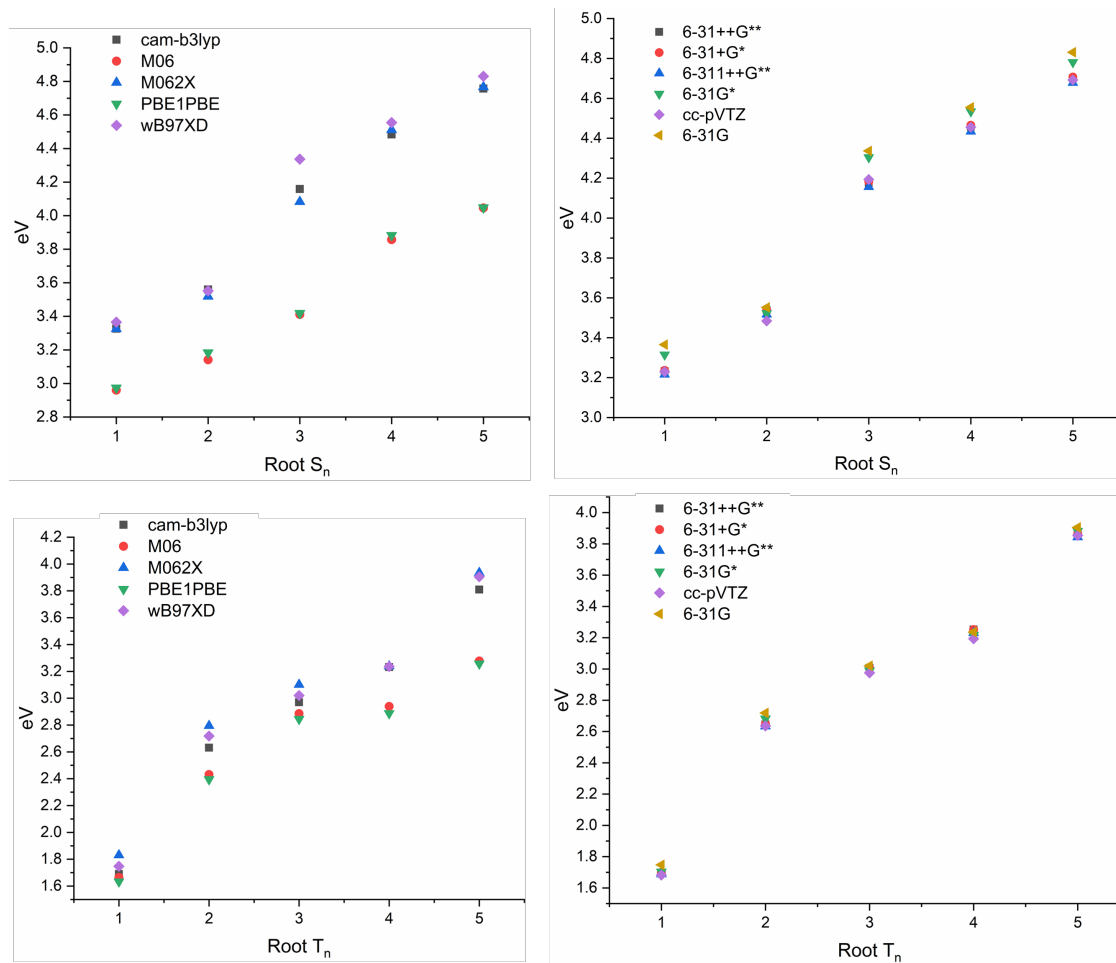

Figure S3. Energy levels of the excited singlet (top row) and triplet (bottom row) calculated with different functionals using the 6-31G and basis sets using the  $\omega$ B97XD at the  $T_1$  equilibrium geometry.

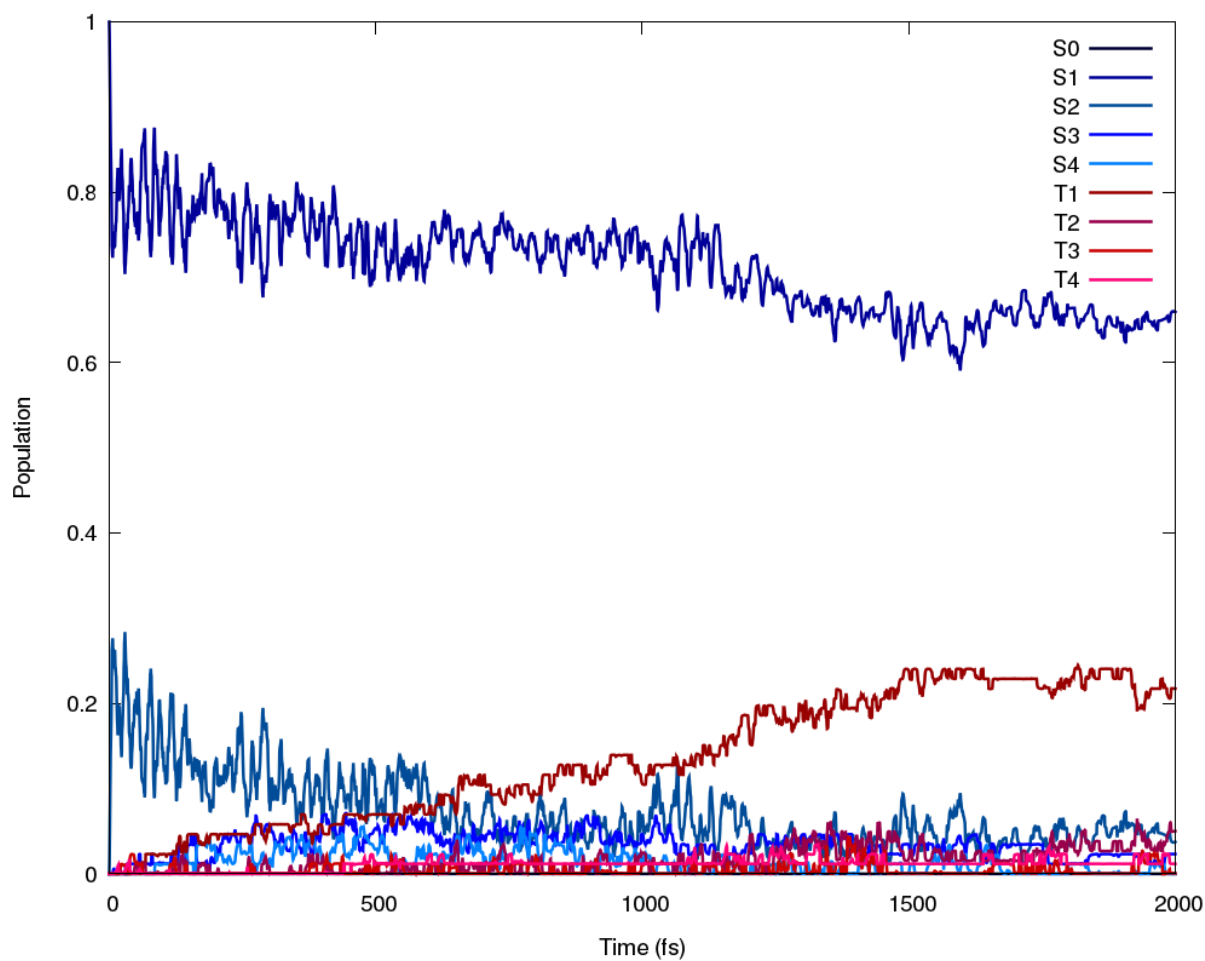

Figure S4. Evolution of the population of the states during the SH dynamic obtained from the multiconfiguration quantum amplitudes, triplet states are represented in red tones, convoluted for the ensemble of the trajectories, and for all the involved states.

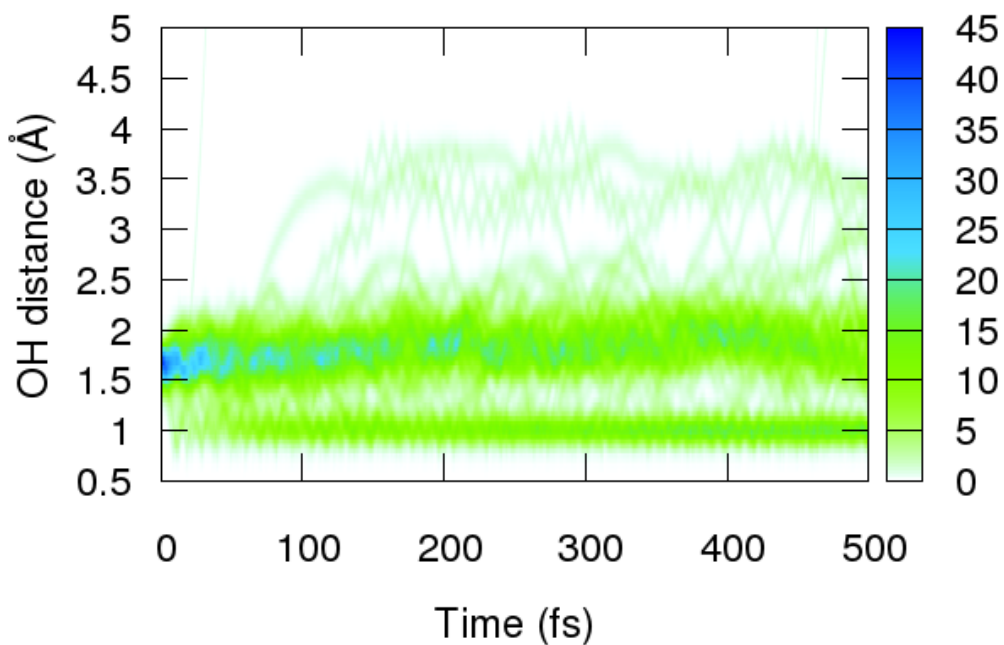

Figure S5. Evolution of the OH distance  $d$  for the ensemble of the trajectories during the first 500 fs of the SH dynamics.

|                      | <b>S<sub>0</sub></b> | <b>S<sub>1</sub></b> | <b>S<sub>2</sub></b> | <b>S<sub>3</sub></b> | <b>S<sub>4</sub></b> | <b>T<sub>1</sub></b> | <b>T<sub>2</sub></b> | <b>T<sub>3</sub></b> | <b>T<sub>4</sub></b> |
|----------------------|----------------------|----------------------|----------------------|----------------------|----------------------|----------------------|----------------------|----------------------|----------------------|
| <b>S<sub>0</sub></b> | 0                    | 0                    | 0                    | 0                    | 0                    | 0                    | 0                    | 0                    | 0                    |
| <b>S<sub>1</sub></b> | 0                    | 0                    | 6                    | 1                    | -9                   | 0                    | -1                   | -8                   | -18                  |
| <b>S<sub>2</sub></b> | 0                    | -6                   | 0                    | 7                    | -1                   | 0                    | 0                    | 1                    | 2                    |
| <b>S<sub>3</sub></b> | 0                    | -1                   | -7                   | 0                    | -10                  | 0                    | 0                    | 0                    | 0                    |
| <b>S<sub>4</sub></b> | 0                    | 9                    | 1                    | 10                   | 0                    | 0                    | 0                    | 0                    | 0                    |
| <b>T<sub>1</sub></b> | 0                    | 0                    | 0                    | 0                    | 0                    | 0                    | 23                   | -6                   | 0                    |
| <b>T<sub>2</sub></b> | 0                    | 1                    | 0                    | 0                    | 0                    | -23                  | 0                    | 26                   | 1                    |
| <b>T<sub>3</sub></b> | 0                    | 8                    | -1                   | 0                    | 0                    | 6                    | -26                  | 0                    | 14                   |
| <b>T<sub>4</sub></b> | 0                    | 18                   | -2                   | 0                    | 0                    | 0                    | -1                   | -14                  | 0                    |

Table S1. Matrix summing the differences of the hops between the states obtained on the ensemble of the SH trajectories.

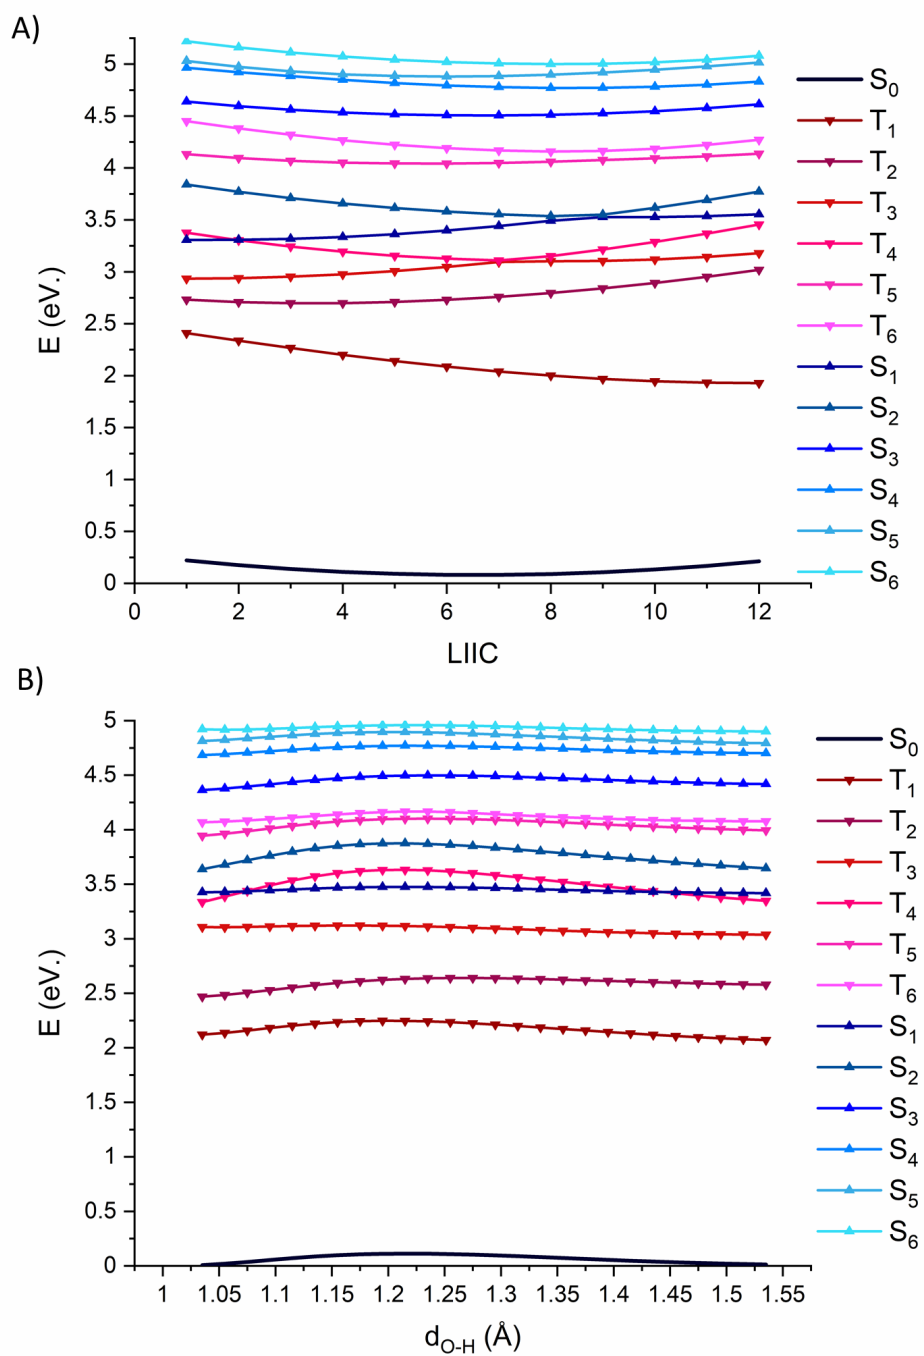

Figure S6. PES for the enol CURC along the LIIC connecting the equilibrium geometry of the first singlet and triplet with six states (A). PES of the different excited state along the Hydrogen transfer coordinate considering six states (B).
